# Supplementary material for: First Report of Clonostachys rosea as a Mycoparasite on Sclerotinia sclerotiorum Causing Head Rot of Cabbage in India
Source: MDPI journal article supplement (doi:10.3390/plants12010199), 2023-01-03
Supplement: s1 [file s1]

## Supplementary files

### Supplementary figures

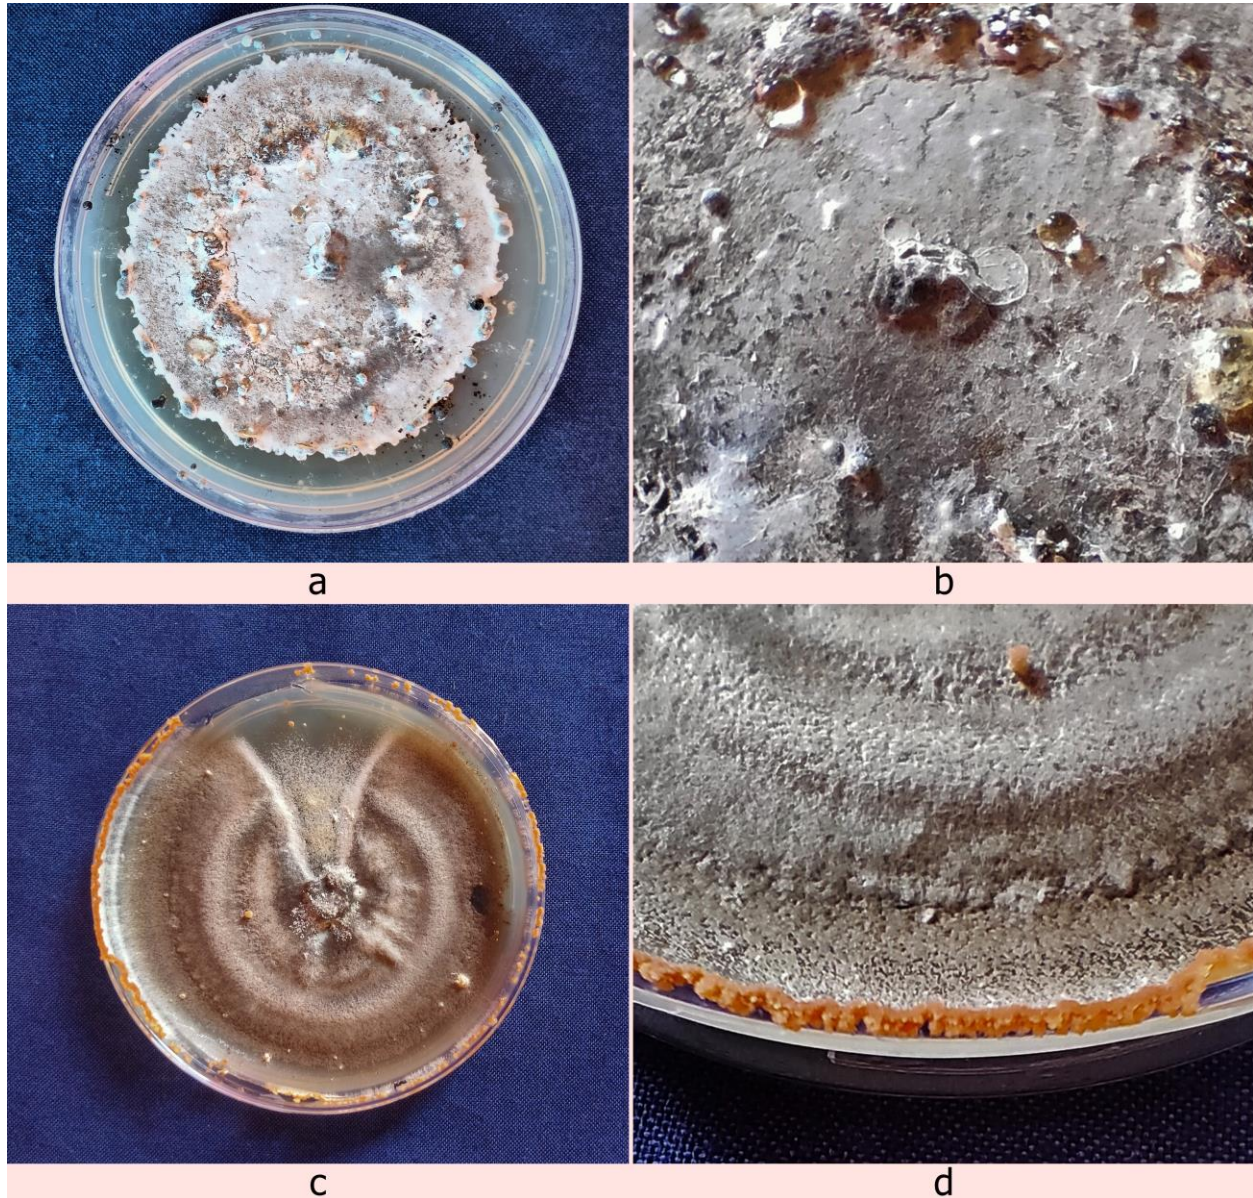

**Figure S1. Initial isolation of mycoparasitic fungi, *C. rosea* from infected sclerotia**

- a- Mycoparasitized sclerotia placed in PDA medium
- b- Presence of infection even in the secondary sclerotia
- c- Gradual overgrowth of *C. rosea* growth from the infected sclerotia
- d- Sporodochial growth over the plate

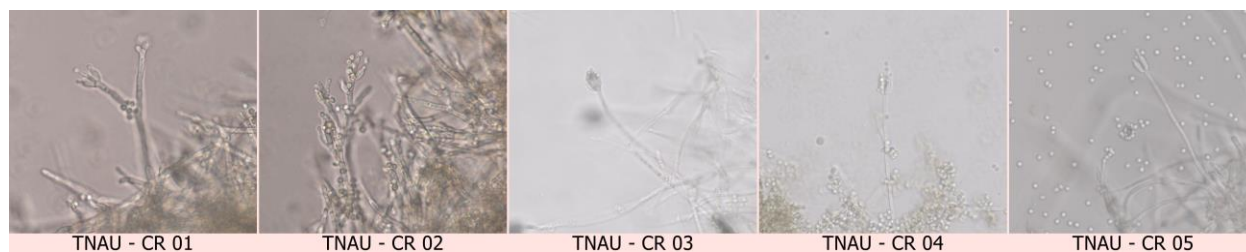

Figure S2. Microscopic examination of fungal mycelium of *C. rosea* isolates under 40x magnification

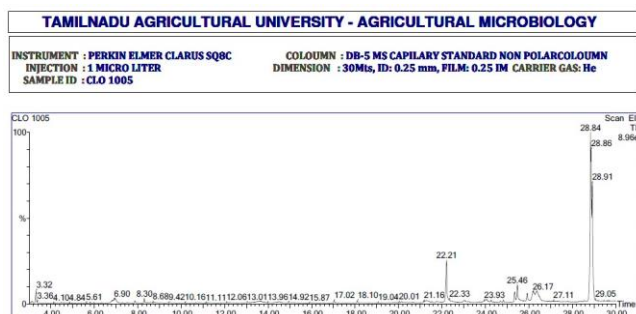

Figure S3. Chromatogram showing the peaks of compounds in the fractions of *C. rosea* TNAU - CR 02

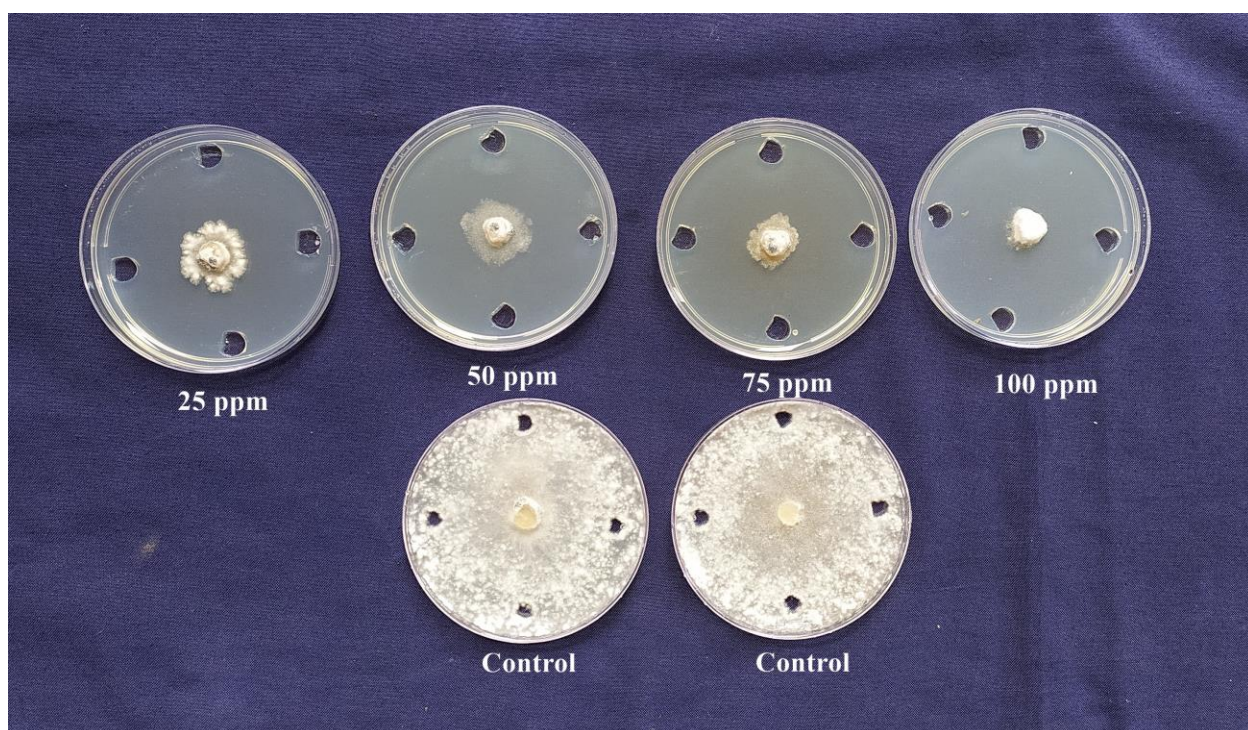

Figure S4. Bioassay of crude antibiotics of *C. rosea* TNAU - CR 02 against *S. sclerotiorum*

## Supplementary table

**Table S1. Colony morphology, pigmentation, and sporulation of *C. rosea* isolates**

| Isolate      | Morphology                        | Pigmentation   | Sporodochia coloration |
|--------------|-----------------------------------|----------------|------------------------|
| TNAU – CR 01 | Whitish yellow sparse mycelium    | Light yellow   | Orange                 |
| TNAU – CR 02 | Slight yellow sparse mycelium     | Light yellow   | Orange                 |
| TNAU – CR 03 | White with light greyish mycelium | whitish yellow | Orange                 |
| TNAU – CR 04 | Dark Yellow dense mycelium        | Dark yellow    | Light Orange           |
| TNAU – CR 05 | Whitish yellow sparse mycelium    | Light yellow   | Orange                 |

**Table S2. Bioassay of crude antibiotics of *C. rosea* TNAU – CR 02 against *S. sclerotiorum***

| Sl.No. | Concentration | Percent inhibition over control |
|--------|---------------|---------------------------------|
| 5      | 25 ppm        | 82.17<br>(65.02) <sup>b</sup>   |
| 6      | 50 ppm        | 87.42<br>(69.22) <sup>b</sup>   |
| 7      | 75 ppm        | 92.33<br>(73.93) <sup>a</sup>   |
| 8      | 100 ppm       | 97.17<br>(80.32) <sup>a</sup>   |

\* Values are means of three replications,

Means in a column followed by same superscript letters are on par with each other according to LSD; Figures in parentheses represent arcsine transformation.
